# Supplementary material
Source: PubMed Central journal article supplement (PMC6736415)
Supplement: supp_fig1_dez098.pdf [file supp_fig1_dez098.pdf]

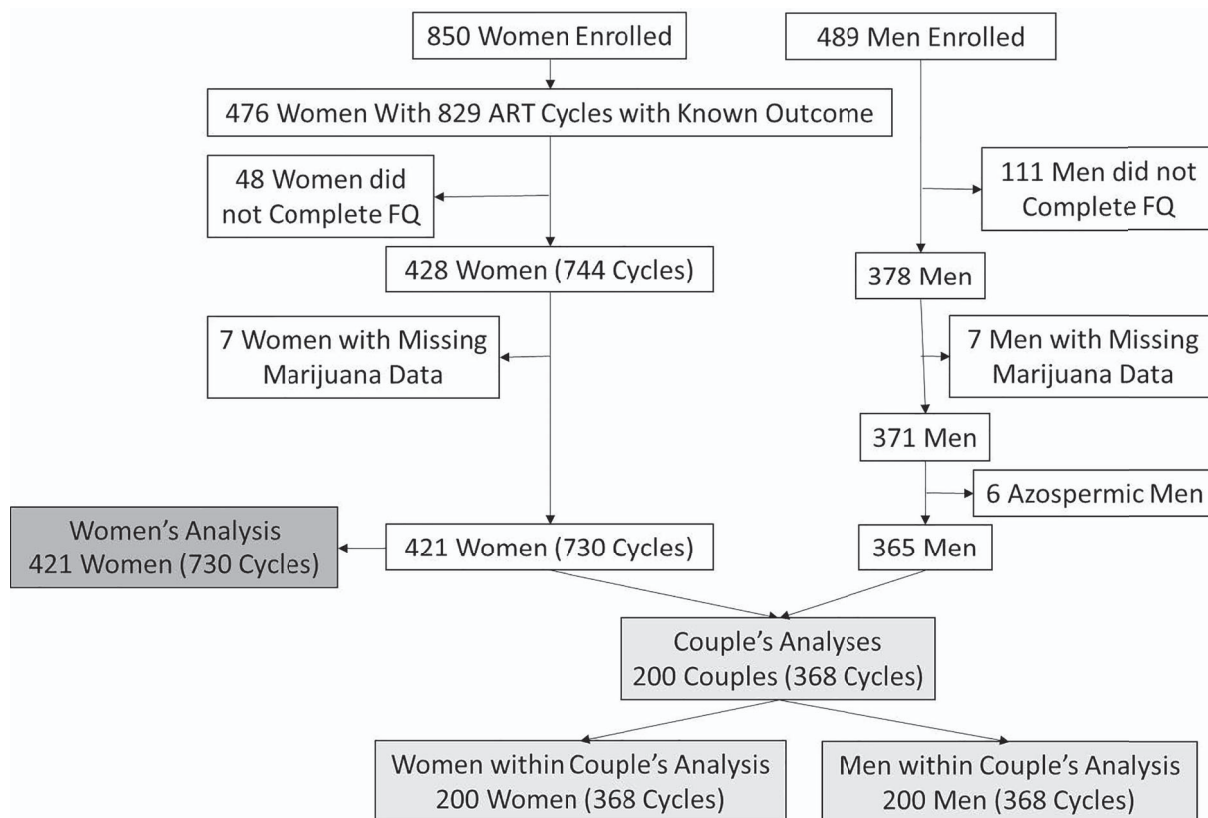

**Supplementary Figure S1** Flowchart of participants included in the analysis of marijuana smoking in relation to clinical ART outcomes in the EARTH study. Abbreviations: EARTH, the Environment and Reproductive Health Study; ART, assisted reproductive technology; FQ, Full take home questionnaire; IVF, assisted reproductive technologies.
