# Supplementary material
Source: PubMed Central journal article supplement (PMC6736415)
Supplement: supp_table1_dez098.pdf [file supp_table1_dez098.pdf]

**Supplementary Table S1** Demographic and cycle characteristics by marijuana smoking categories among 200 women (368 cycles) who were among participating couples in the EARTH study.

| Baseline characteristics                                        | All Women  | Never      | Past       | At enrollment         | P Value <sup>1</sup> |
|-----------------------------------------------------------------|------------|------------|------------|-----------------------|----------------------|
| Participants, n (%)                                             | 200        | 115 (58)   | 81 (41)    | 4 (2)                 |                      |
| Cycles, n (%)                                                   | 368        | 209 (57)   | 150 (41)   | 9 (2)                 |                      |
| Age, years                                                      | 34.9 (3.8) | 35.0 (3.8) | 34.7 (3.8) | 37.0 (1.6)            | 0.32                 |
| Caucasian, n (%)                                                | 172 (86)   | 94 (82)    | 74 (91)    | 4 (100)               | 0.16                 |
| Body mass index, kg/m <sup>2</sup>                              | 24.0 (4.5) | 24.1 (4.8) | 23.8 (4.0) | 24.6 (5.0)            | 0.97                 |
| Tobacco Smoking, n (%)                                          |            |            |            |                       | <0.0001              |
| Never                                                           | 145 (73)   | 100 (87)   | 42 (52)    | 3 (75)                |                      |
| Former                                                          | 51 (26)    | 13 (11)    | 38 (47)    | 0                     |                      |
| At enrollment                                                   | 4 (2)      | 2 (2)      | 1 (1)      | 1 (25)                |                      |
| College degree or higher, n (%)                                 | 188 (94)   | 108 (94)   | 77 (95)    | 3 (75)                | 0.32                 |
| Cocaine use, n (%)                                              | 25 (13)    | 1 (1)      | 24 (30)    | 0                     | <0.0001              |
| Coffee intake ≥5 cup/week, n (%)                                | 99 (50)    | 49 (43)    | 49 (60)    | 1 (25)                | 0.02                 |
| Alcohol intake ≥1 day/week, n (%)                               | 110 (55)   | 53 (46)    | 54 (67)    | 3 (75)                | 0.007                |
| Moderate to vigorous physical activity, hours/week <sup>2</sup> | 3.9 (4.0)  | 3.8 (3.7)  | 4.1 (4.4)  | 2.2 (2.2)             | 0.67                 |
| History of Sexually transmitted diseases, n (%) <sup>3</sup>    | 61 (31)    | 31 (27)    | 28 (35)    | 2 (50)                | 0.30                 |
| Infertility diagnosis/couple, n (%)                             |            |            |            |                       |                      |
| Male factor                                                     | 65 (33)    | 37 (32)    | 28 (35)    | 0                     | 0.61                 |
| Female factor                                                   | 59 (30)    | 36 (31)    | 21 (26)    | 2 (50)                |                      |
| Unexplained                                                     | 76 (38)    | 42 (37)    | 32 (40)    | 2 (50)                |                      |
| Stimulation protocol, n (%)                                     |            |            |            |                       | 0.45                 |
| Luteal phase agonist <sup>4</sup>                               | 145 (73)   | 82 (71)    | 62 (77)    | 1 (25)                |                      |
| Flare <sup>5</sup>                                              | 20 (10)    | 12 (10)    | 7 (9)      | 1 (25)                |                      |
| Antagonist                                                      | 21 (11)    | 12 (10)    | 8 (10)     | 1 (25)                |                      |
| Egg donor or cryo-thaw cycle                                    | 14 (7)     | 9 (8)      | 4 (5)      | 1 (25)                |                      |
| Day 3 FSH concentrations, mIU/l                                 | 7.2 (2.5)  | 7.1 (2.1)  | 7.3 (1.6)  | 7.3 (1.6)             | 0.70                 |
| Average marijuana joints smoked/week <sup>6</sup>               |            | 0          | 0.9 (1.1)  | 0.7 (0.3)             | 0.65                 |
| Duration of marijuana-smoking, years <sup>6</sup>               |            | 0          | 10.5 (5.6) | 15.9 (.) <sup>7</sup> | 0.30                 |
| Marijuana joint-year <sup>6</sup>                               |            | 0          | 1.3 (1.5)  | 1.1 (.) <sup>7</sup>  | 0.55                 |
| Age of marijuana-smoking start, years <sup>6</sup>              |            | NA         | 17.8 (3.7) | 23.3 (7.3)            | 0.02                 |
| Partner's age, years                                            | 36.5 (5.0) | 36.8 (5.5) | 36.2 (4.3) | 36.9 (2.5)            | 0.92                 |
| Partner's marijuana smoking at enrollment, n (%)                | 23 (12)    | 12 (10)    | 9 (11)     | 2 (50)                | 0.0001               |

Abbreviations: EARTH, the Environment and Reproductive Health Study; ART, assisted reproductive technology; BMI, body mass index; FSH, follicle stimulating hormone; STDs, sexually transmitted diseases; mins, minutes.

N (%) is presented for categorical/binary variables and mean (standard deviation) is presented for continuous variables.

<sup>1</sup>From Chi-square (or Fisher's exact test when appropriate) for discrete variables and Kruskal-Wallis for continuous variables.

<sup>2</sup>Includes weight and aerobic exercise and sports.

<sup>3</sup>Syphilis, gonorrhea, mycoplasma/ureaplasma, chlamydia, trichomonas, herpes, human papilloma virus, lymphogranuloma, group-B strep or other STDs

<sup>4</sup>Luteal-phase GnRH-agonist protocol.

<sup>5</sup>Follicular-phase GnRH-agonist/flare protocol.

<sup>6</sup>The numbers presented for the entire cohort are restricted to ever marijuana smokers and who had this information not missing.

<sup>7</sup>Only one woman was in this category with non-missing information, therefore SD could not be estimated.
