# Supplementary material
Source: PubMed Central journal article supplement (PMC6736415)
Supplement: supp_table3_dez098.pdf [file supp_table3_dez098.pdf]

**Supplemental Table III** Marginal covariate-adjusted probabilities of clinical ART outcomes associated with women's marijuana smoking status among women joining as a couple (N= 200 couples, 368 cycles) in the EARTH study.

|                                  | Participants (N) | Cycles (n) | Implantation, per 100 cycles initiated |                          | Clinical pregnancy, per 100 cycles initiated |                          | Live birth, per 100 cycles initiated |                          |
|----------------------------------|------------------|------------|----------------------------------------|--------------------------|----------------------------------------------|--------------------------|--------------------------------------|--------------------------|
|                                  |                  |            | Age adjusted <sup>1</sup>              | MV adjusted <sup>2</sup> | Age adjusted <sup>1</sup>                    | MV adjusted <sup>2</sup> | Age adjusted <sup>1</sup>            | MV adjusted <sup>2</sup> |
| <b>Women's marijuana smoking</b> |                  |            |                                        |                          |                                              |                          |                                      |                          |
| Never                            | 115              | 209        | 57.0<br>(49.9,63.9)                    | 56.4<br>(48.7,63.8)      | 49.3<br>(42.7,56.0)                          | 49.2<br>(42.1,56.3)      | 40.0<br>(33.4,46.9)                  | 39.5<br>(32.6,46.9)      |
| Ever                             | 85               | 159        | 54.2<br>(45.1,63.0)                    | 56.7<br>(46.9,66.0)      | 45.4<br>(36.9,54.3)                          | 46.5<br>(37.6,55.7)      | 39.9<br>(31.1,49.5)                  | 41.0<br>(31.6,51.1)      |
| Never                            | 115              | 209        | 61.5<br>(52.5,69.7)                    | 61.9<br>(52.4,70.6)      | 53.2<br>(45.0,61.2)                          | 53.6<br>(45.0,62.0)      | 44.5<br>(36.4,52.8)                  | 44.3<br>(35.7,53.2)      |
| Past                             | 81               | 150        | 58.2<br>(47.0,68.6)                    | 62.1<br>(51.7,71.5)      | 49.3<br>(39.2,59.5)                          | 51.3<br>(41.1,61.4)      | 45.5<br>(35.0,56.4)                  | 47.7<br>(36.6,59.0)      |
| At enrollment                    | 4                | 9          | 73.8<br>(24.9,96.0)                    | 68.0<br>(21.6,94.3)      | 52.1<br>(21.9,80.8)                          | 46.5<br>(21.2,73.8)      | 31.8<br>(12.7,59.9)                  | 25.1<br>(10.1,50.0)      |
| Not-At enrollment                | 196              | 359        | 63.1<br>(52.7,72.9)                    | 65.7<br>(55.7,74.5)      | 54.1<br>(44.6,63.3)                          | 54.9<br>(45.6,63.8)      | 47.8<br>(38.5,57.4)                  | 48.6<br>(39.0,58.3)      |
| At enrollment                    | 4                | 9          | 76.1<br>(27.7,96.3)                    | 70.9<br>(24.5,94.8)      | 55.2<br>(24.5,82.3)                          | 50.5<br>(24.9,75.9)      | 34.6<br>(14.6,62.1)                  | 28.4<br>(12.5,52.4)      |

Abbreviations: EARTH, the Environment and Reproductive Health Study; ART, assisted reproductive technology; MV, multivariable.

<sup>1</sup>Data is presented as covariate-adjusted marginal means with 95% confidence intervals adjusted for both men's and women's marijuana smoking and age.

<sup>2</sup>Data is presented as covariate-adjusted marginal means with 95% confidence intervals adjusted for both men's and women's marijuana smoking, age, body mass index, race, tobacco smoking status, coffee intake, alcohol intake and cocaine use.

Analysis was done using generalized linear mixed models with random intercepts, binary distribution and logit link function and empirical standard error.

The marginal covariate-adjusted probabilities were used to present the results adjusted for the covariates at their average levels for continuous variables and weighted average level of categorical variable in the model.

\*P < 0.05.
